# Supplementary material
Source: MDPI journal article supplement (https://www.mdpi.com/2076-3298/10/3/38)
Supplement: s1 [file s1]

## Article

# Impact of Polarization Reversal during Photoelectrocatalytic Treatment of WWTP Effluents

Maria Cristina Collivignarelli <sup>1,2</sup>, Marco Carnevale Miino <sup>1</sup>, Francesca Maria Caccamo <sup>1</sup>, Alessandro Abbà <sup>3,\*</sup>, Massimiliano Bestetti <sup>4</sup>, Silvia Franz <sup>4</sup>

<sup>1</sup> Department of Civil Engineering and Architecture, University of Pavia, via Ferrata 3, 27100 Pavia, Italy; [mcristina.collivignarelli@unipv.it](mailto:mcristina.collivignarelli@unipv.it) (M.C.C.); [marco.carnevalemiino01@universitadipavia.it](mailto:marco.carnevalemiino01@universitadipavia.it) (M.C.M.); [francescamaria.caccamo01@universitadipavia.it](mailto:francescamaria.caccamo01@universitadipavia.it) (F.M.C.)

<sup>2</sup> Interdepartmental Centre for Water Research, University of Pavia, via Ferrata 3, 27100 Pavia, Italy

<sup>3</sup> Department of Civil, Environmental, Architectural Engineering and Mathematics, University of Brescia, via Branze 43, 25123 Brescia, Italy

<sup>4</sup> Department of Chemistry, Materials and Chemical Engineering “Giulio Natta”, Politecnico di Milano, Via Mancinelli 7, 20131 Milano, Italy; [massimiliano.bestetti@polimi.it](mailto:massimiliano.bestetti@polimi.it) (M.B.); [silvia.franz@polimi.it](mailto:silvia.franz@polimi.it) (S.F.)

\* Correspondence: [alessandro.abb@unibs.it](mailto:alessandro.abb@unibs.it) (A.A.)

FIGURE S1:

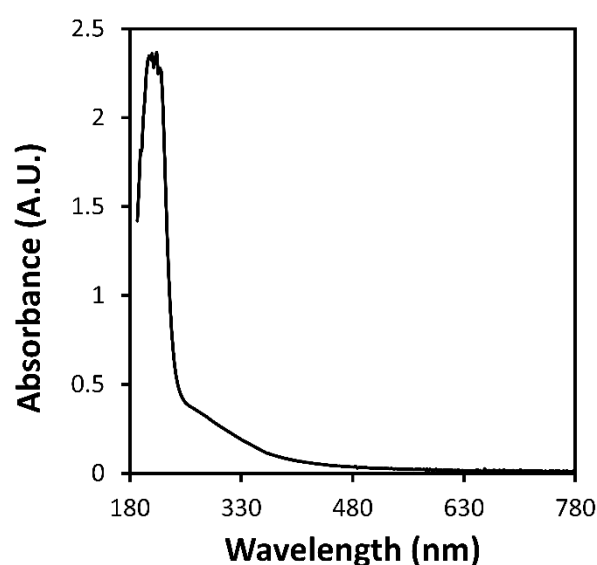

Figure S1. UV-Vis absorbance spectra of the untreated WWTP effluents.

**FIGURE S2:**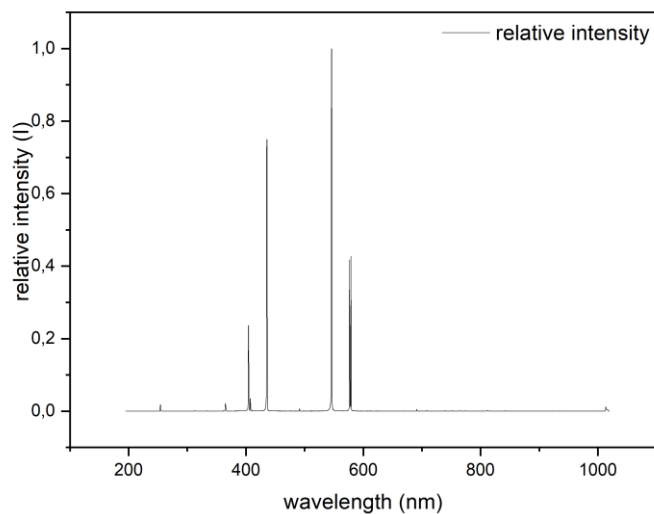**Figure S2.** Emission spectra of medium-pressure Hg vapor lamp used in the study.**FIGURE S3:**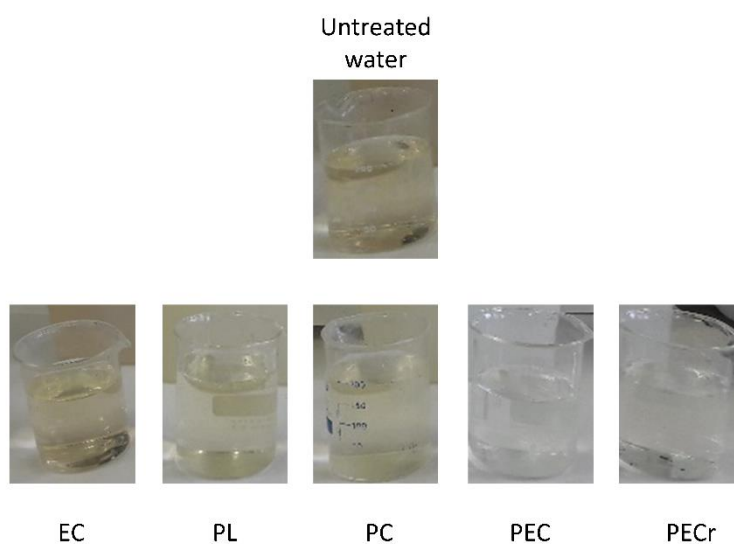**Figure S3.** Samples of untreated water and after 2h of EC, PL, PC, PEC and PECr.
